# Supplementary material for: Dietary sodium-to-potassium ratio as a risk factor for stroke, cardiovascular disease and all-cause mortality in Japan: the NIPPON DATA80 cohort study
Source: PubMed Central journal article supplement — BMJ Open. 2016 Jul 13;6(7):e011632. doi: 10.1136/bmjopen-2016-011632 (PMC4947715; doi:10.1136/bmjopen-2016-011632), 2016-07-13

## Supplement Materials

### **Dietary sodium to potassium ratio as a risk factor for stroke, cardiovascular diseases and all-cause mortality in Japan: The NIPPON DATA80 Cohort Study**

Akira Okayama, MD, PhD, Nagako Okuda, MD, PhD, Katsuyuki Miura, MD, PhD, Tomonori Okamura, MD, PhD, Takehito Hayakawa, PhD, Hiroshi Akasaka, MD, PhD, Hirofumi Ohnishi, MD, PhD, Shigeyuki Saitoh, MD, PhD, Yusuke Arai, PhD, Yutaka Kiyohara, MD, PhD, Miho Nozue, PhD, Naoyuki Takashima, MD, PhD, Katsushi Yoshita, PhD, Akira Fujiyoshi, MD, PhD, Maryam Zaid, PhD, Takayoshi Ohkubo, MD, PhD, and Hirotsugu Ueshima, MD, PhD, on behalf of the NIPPON DATA80 Research Group

Corresponding author:

Akira Okayama, MD, PhD

Research Institute of Strategy for Prevention

Shinkawa 1-3-9 4F, Chuohku, Tokyo 104-0033, Japan

Email address: aokayama@jrisp.com

TEL: +81-3-4560-1955      FAX: +81-3-4560-1960

List of online materials

#### **Online Supplement Table 1.**

Definition of underlying causes of death using International Classification of Disease (ICD) during follow-up period (1980-2004).

#### **Online Supplement Table 2.**

Age-adjusted relative risks and 95 percent confidence interval for deaths from all causes, cardiovascular and stroke subtypes according to the quintiles of dietary sodium-to-potassium ratio by Mantel-Haenszel method for 24-year follow-up NIPPON DATA80.

#### **Online Supplement Table 3.**

Quadratic nonlinear multivariate-adjusted hazard ratio (HR) and 95% confidence interval (95% CI) for deaths from all causes, cardiovascular diseases (CVD), stroke, and stroke subtypes for the highest quintile vs. the lowest quintile of dietary sodium-to-potassium ratio in men and women.

#### **Online Supplement Table 4.**

Person-years, mortality numbers (No.) and age-adjusted mortality rate (per 100,000 person-years) according to quintiles of dietary sodium-to-potassium ratio for deaths from all causes, cardiovascular diseases (CVD), stroke and stroke subtypes by 24-year follow-up of the

participants of National Survey on Cardiovascular Disease in 1980 (NIPPON DATA80) using density value.

**Online Supplement Table 5.**

Age-adjusted relative hazard and 95 percent confidence interval for deaths from all causes, cardiovascular diseases (CVD), stroke and stroke subtypes according to dietary sodium-to-potassium ratio quintiles using density value by Mantel-Haenszel method for 24-year follow-up among participants without antihypertensive drugs in NIPPON DATA80.

**Online Supplement Table 6.**

Quadratic multivariate-adjusted hazard ratio (HR) and 95% confidence interval (95% CI) for deaths from all causes, cardiovascular diseases (CVD), stroke, and stroke subtypes for the highest quintile vs. the lowest quintile dietary sodium-to-potassium ratio from density value in total participants.

**Online Supplement Figure.**

Participants Flow Chart

Online Supplement Table 1. Definition of underlying causes of death using International Classification of Disease (ICD) during follow-up period (1980-2004).

|                         | ICD-9 (1980-1994)    | ICD-10 (1995-2004) |
|-------------------------|----------------------|--------------------|
| Total stroke            | 430-438              | I60-I69            |
| Ischemic stroke         | 433, 434, 437.7a, 7b | I63, I69.3         |
| Hemorrhagic stroke      | 431-432              | I61, I69.1         |
| Cardiovascular diseases | 390-459              | I00-I99            |

Online Supplement Table 2. Age-adjusted relative risks and 95 percent confidence interval for deaths from all causes, cardiovascular and stroke subtypes according to the quintiles of dietary sodium-to-potassium ratio by Mantel-Haenszel method for 24-year follow-up NIPPON DATA80.

|                    | Q1 | Q2                 | Q3                  | Q4                 | Q5                  | P *   | P **   |
|--------------------|----|--------------------|---------------------|--------------------|---------------------|-------|--------|
| <b>Men</b>         |    |                    |                     |                    |                     |       |        |
| All causes         | 1  | 0.95 (0.78- 1.16)  | 1.10 (0.91- 1.33)   | 1.16 (0.96- 1.40)  | 1.26 (1.04- 1.51)   | 0.003 | <0.001 |
| CVD                | 1  | 1.10 (0.77- 1.59)  | 1.03 (0.71- 1.49)   | 1.18 (0.82- 1.70)  | 1.56 (1.11- 2.20)   | 0.020 | <0.001 |
| Stroke             | 1  | 1.08 (0.63- 1.87)  | 1.42 (0.85- 2.37)   | 1.44 (0.86- 2.41)  | 1.63 (0.97- 2.72)   | 0.061 | 0.032  |
| Ischemic stroke    | 1  | 0.93 (0.48- 1.81)  | 1.10 (0.58- 2.08)   | 1.32 (0.65- 2.70)  | 1.05 (0.57- 1.93)   | 0.534 | 0.073  |
| Hemorrhagic stroke | 1  | 6.81 (1.20- 38.79) | 10.48 (2.10- 52.30) | 8.87 (1.75- 45.05) | 11.10 (2.24- 54.69) | 0.010 | 0.041  |
| <b>Women</b>       |    |                    |                     |                    |                     |       |        |
| All causes         | 1  | 1.13 (0.91- 1.39)  | 0.93 (0.75- 1.15)   | 1.04 (0.84- 1.29)  | 1.16 (0.94- 1.42)   | 0.356 | 0.119  |
| CVD                | 1  | 1.20 (0.82- 1.75)  | 0.94 (0.64- 1.40)   | 1.11 (0.76- 1.63)  | 1.23 (0.86- 1.77)   | 0.465 | 0.096  |
| Stroke             | 1  | 1.19 (0.64- 2.22)  | 1.22 (0.67- 2.24)   | 1.17 (0.63- 2.17)  | 1.81 (1.05- 3.13)   | 0.052 | 0.003  |
| Ischemic stroke    | 1  | 1.34 (0.57- 3.12)  | 1.29 (0.56- 2.99)   | 1.27 (0.54- 2.98)  | 1.66 (0.76- 3.60)   | 0.231 | 0.277  |
| Hemorrhagic stroke | 1  | 0.76 (0.25- 2.34)  | 0.44 (0.12- 1.60)   | 0.61 (0.19- 1.99)  | 1.27 (0.48- 3.35)   | 0.855 | 0.139  |

\* P values of the test for linear trends were calculated using Cox proportional hazards model. \*\* P values of the test for quadratic nonlinear trends were calculated using Cox proportional hazards model.

Online Supplement Table 3. Quadratic nonlinear multivariate-adjusted hazard ratio (HR) and 95% confidence interval (95% CI) for deaths from all causes, cardiovascular diseases (CVD), stroke, and stroke subtypes for the highest quintile vs. the lowest quintile of dietary sodium-to-potassium ratio in men and

|                    | Men  |              | Women |              |
|--------------------|------|--------------|-------|--------------|
|                    | H.R. | (95% CI)     | H.R.  | (95% CI)     |
| <b>Model I</b>     |      |              |       |              |
| All causes         | 1.23 | (1.09- 1.38) | 1.11  | (0.97- 1.28) |
| CVD                | 1.51 | (1.24- 1.83) | 1.21  | (0.97- 1.52) |
| Stroke             | 1.37 | (1.02- 1.85) | 1.47  | (1.13- 1.92) |
| Ischemic stroke    | 1.49 | (1.01- 2.20) | 1.39  | (0.90- 2.14) |
| Hemorrhagic stroke | 1.65 | (0.97- 2.80) | 1.47  | (0.79- 2.75) |
| <b>Model II</b>    |      |              |       |              |
| All causes         | 1.21 | (1.07- 1.37) | 1.09  | (0.95- 1.26) |
| CVD                | 1.54 | (1.27- 1.88) | 1.22  | (0.97- 1.53) |
| Stroke             | 1.40 | (1.03- 1.88) | 1.48  | (1.13- 1.94) |
| Ischemic stroke    | 1.53 | (1.04- 2.25) | 1.38  | (0.88- 2.16) |
| Hemorrhagic stroke | 1.65 | (0.97- 2.81) | 1.49  | (0.79- 2.79) |
| <b>Model III</b>   |      |              |       |              |
| All causes         | 1.19 | (1.05- 1.35) | 1.09  | (0.95- 1.26) |
| CVD                | 1.50 | (1.23- 1.83) | 1.22  | (0.98- 1.53) |
| Stroke             | 1.35 | (0.99- 1.84) | 1.49  | (1.14- 1.94) |
| Ischemic stroke    | 1.50 | (1.01- 2.22) | 1.39  | (0.89- 2.17) |
| Hemorrhagic stroke | 1.59 | (0.92- 2.75) | 1.53  | (0.82- 2.87) |

Model I was adjusted for age, sex (for total participants), BMI, smoking and drinking habits.

Model II was adjusted for variables in model I plus diabetes and serum total cholesterol.

Model III was adjusted for variables in model II plus percent energy intake from protein and total fat

Online Supplement Table 4. Person-years, mortality numbers (No.) and age-adjusted mortality rate (per 100,000 person-years) according to quintiles of dietary sodium-to-potassium ratio for deaths from all causes, cardiovascular diseases (CVD), stroke and stroke subtypes by 24-year follow-up of the participants of National Survey on Cardiovascular Disease in 1980 (NIPPON DATA80) using density value.

|                               | Total  | Q1    |           | Q2        |        | Q3        |        | Q4        |        | Q5        |        |
|-------------------------------|--------|-------|-----------|-----------|--------|-----------|--------|-----------|--------|-----------|--------|
|                               |        | No.   | (rate)    | No.       | (rate) | No.       | (rate) | No.       | (rate) | No.       | (rate) |
| <b>Men</b>                    |        |       |           |           |        |           |        |           |        |           |        |
| <i>Person years</i>           | 76399  | 15052 |           | 15288     |        | 15953     |        | 15604     |        | 14502     |        |
| All Causes                    |        | 186   | (824)     | 192       | (882)  | 201       | (856)  | 243       | (1013) | 264       | (1082) |
| CVD                           |        | 52    | (227)     | 56        | (259)  | 52        | (219)  | 65        | (276)  | 84        | (342)  |
| Stroke                        |        | 24    | (106)     | 28        | (133)  | 28        | (118)  | 35        | (150)  | 40        | (157)  |
| Ischemic Stroke               |        | 18    | (78)      | 17        | (79)   | 14        | (61)   | 19        | (79)   | 22        | (80)   |
| Hemorrhagic Stroke            |        | 1     | (4)       | 8         | (41)   | 8         | (32)   | 9         | (38)   | 13        | (49)   |
| <b>Women</b>                  |        |       |           |           |        |           |        |           |        |           |        |
| <i>Person years</i>           | 100546 | 20129 |           | 20177     |        | 20404     |        | 20499     |        | 19337     |        |
| All Causes                    |        | 159   | (471)     | 158       | (499)  | 155       | (457)  | 161       | (437)  | 219       | (554)  |
| CVD                           |        | 46    | (137)     | 54        | (173)  | 49        | (141)  | 45        | (115)  | 75        | (177)  |
| Stroke                        |        | 14    | (45)      | 19        | (67)   | 24        | (64)   | 17        | (44)   | 41        | (98)   |
| Ischemic Stroke               |        | 8     | (22)      | 9         | (27)   | 15        | (39)   | 10        | (26)   | 18        | (42)   |
| Hemorrhagic Stroke            |        | 4     | (16)      | 7         | (22)   | 3         | (9)    | 3         | (8)    | 11        | (26)   |
| <b>Men and women combined</b> |        |       |           |           |        |           |        |           |        |           |        |
| <i>Person years</i>           | 176944 | 35181 |           | 35464     |        | 36358     |        | 36103     |        | 33838     |        |
| All Causes                    |        | 1938  | 345 (615) | 350 (656) |        | 356 (622) |        | 404 (674) |        | 483 (771) |        |
| CVD                           |        | 579   | 98 (173)  | 110 (208) |        | 101 (172) |        | 110 (181) |        | 160 (243) |        |

|                    |     |    |      |    |      |    |      |    |      |    |       |
|--------------------|-----|----|------|----|------|----|------|----|------|----|-------|
| Stroke             | 270 | 38 | (69) | 47 | (93) | 52 | (86) | 52 | (86) | 81 | (122) |
| Ischemic Stroke    | 150 | 26 | (45) | 26 | (47) | 29 | (48) | 29 | (46) | 40 | (56)  |
| Hemorrhagic Stroke | 67  | 5  | (11) | 15 | (30) | 11 | (19) | 12 | (19) | 24 | (35)  |

---

---

Online Supplement Table 5. Age-adjusted relative hazard and 95 percent confidence interval for deaths from all causes, cardiovascular diseases (CVD), stroke and stroke subtypes according to dietary sodium-to-potassium ratio quintiles using density value by Mantel-Haenszel method for 24-year follow-up among participants without antihypertensive drugs in NIPPON DATA80.

|                               | Q1 | Q2                 | Q3                 | Q4                 | Q5                  | P*    | P**   |
|-------------------------------|----|--------------------|--------------------|--------------------|---------------------|-------|-------|
| <b>Men</b>                    |    |                    |                    |                    |                     |       |       |
| All Causes                    | 1  | 1.07 (0.87- 1.34)  | 1.03 (0.85- 1.26)  | 1.22 (1.01- 1.52)  | 1.26 (1.04- 1.52)   | 0.014 | -     |
| CVD                           | 1  | 1.07 (0.77- 1.68)  | 0.95 (0.66- 1.43)  | 1.17 (0.81- 1.90)  | 1.43 (1.01- 2.03)   | 0.075 | -     |
| Stroke                        | 1  | 1.18 (0.71- 2.29)  | 1.24 (0.66- 1.97)  | 1.38 (0.82- 2.86)  | 1.46 (0.88- 2.45)   | 0.180 | -     |
| Ischemic Stroke               | 1  | 0.91 (0.52- 2.07)  | 0.75 (0.38- 1.53)  | 0.99 (0.52- 2.20)  | 1.03 (0.55- 1.95)   | 0.980 | -     |
| Hemorrhagic Stroke            | 1  | 5.99 (1.45- 38.89) | 7.46 (1.23- 45.23) | 8.69 (1.53- 42.58) | 12.19 (2.36- 71.43) | 0.014 | -     |
| <b>Women</b>                  |    |                    |                    |                    |                     |       |       |
| All Causes                    | 1  | 1.06 (0.85- 1.19)  | 0.96 (0.77- 1.19)  | 0.95 (0.76- 1.18)  | 1.15 (0.94- 1.42)   | 0.509 | -     |
| CVD                           | 1  | 1.27 (0.86- 1.87)  | 1.05 (0.70- 1.56)  | 1.91 (0.61- 1.38)  | 1.37 (0.95- 1.97)   | 0.481 | -     |
| Stroke                        | 1  | 1.44 (0.73- 2.86)  | 1.68 (0.88- 3.22)  | 1.13 (0.56- 2.30)  | 2.44 (1.35- 4.43)   | 0.016 | -     |
| Ischemic Stroke               | 1  | 1.25 (0.49- 3.19)  | 1.84 (0.79- 4.26)  | 1.16 (0.46- 1.16)  | 1.79 (0.80- 4.03)   | 0.189 | -     |
| Hemorrhagic Stroke            | 1  | 1.78 (0.53- 5.93)  | 0.73 (0.16- 3.29)  | 0.73 (0.16- 3.25)  | 2.41 (0.73- 7.89)   | 0.505 | -     |
| <b>Men and women combined</b> |    |                    |                    |                    |                     |       |       |
| All Causes                    | 1  | 1.06 (0.92- 1.32)  | 1.00 (0.86- 1.16)  | 1.10 (0.95- 1.27)  | 1.20 (1.05- 1.38)   | 0.018 | 0.001 |
| CVD                           | 1  | 1.19 (0.91- 1.56)  | 1.01 (0.76- 1.33)  | 1.05 (0.80- 1.38)  | 1.39 (1.08- 1.79)   | 0.086 | 0.005 |
| Stroke                        | 1  | 1.31 (0.86- 2.86)  | 1.68 (0.88- 3.22)  | 1.13 (0.56- 2.30)  | 2.44 (1.35- 1.23)   | 0.011 | 0.002 |
| Ischemic Stroke               | 1  | 1.08 (0.63- 1.86)  | 1.10 (0.65- 1.86)  | 1.04 (0.61- 1.76)  | 1.25 (0.77- 2.05)   | 0.438 | 0.024 |
| Hemorrhagic Stroke            | 1  | 3.03 (1.17- 7.88)  | 2.1 (0.74- 5.96)   | 2.3 (0.83- 6.42)   | 4.33 (1.69- 11.08)  | 0.023 | 0.099 |



\* P values of the test for linear trends were calculated using Cox proportional hazards model.

\*\* P value of the test for quadratic nonlinear trends were calculated using Cox proportional hazards model.

Online Supplement Table 6. Quadratic multivariate-adjusted hazard ratio (HR) and 95% confidence interval (95% CI) for deaths from all causes, cardiovascular diseases (CVD), stroke, and stroke subtypes for the highest quintile vs. the lowest quintile dietary sodium-to-potassium ratio from density value in total participants.

|                                                                   | H.R. | (95% CI)     |
|-------------------------------------------------------------------|------|--------------|
| Model I (adjusted for age, sex, BMI, smoking and drinking habits) |      |              |
| All Causes                                                        | 1.14 | (1.05- 1.24) |
| CVD                                                               | 1.29 | (1.13- 1.47) |
| Stroke                                                            | 1.37 | (1.14- 1.64) |
| Ischemic Stroke                                                   | 1.36 | (1.05- 1.74) |
| Hemorrhagic Stroke                                                | 1.48 | (1.04- 2.11) |
| Model II ( Model I + diabetes and serum cholesterol levels)       |      |              |
| All Causes                                                        | 1.13 | (1.03- 1.23) |
| CVD                                                               | 1.31 | (1.15- 1.49) |
| Stroke                                                            | 1.38 | (1.15- 1.65) |
| Ischemic Stroke                                                   | 1.37 | (1.07- 1.77) |
| Hemorrhagic Stroke                                                | 1.49 | (1.04- 2.13) |
| Model III (Model II + protein and total fat intake)               |      |              |
| All Causes                                                        | 1.13 | (1.03- 1.24) |
| CVD                                                               | 1.34 | (1.16- 1.54) |
| Stroke                                                            | 1.39 | (1.14- 1.69) |
| Ischemic Stroke                                                   | 1.37 | (1.04- 1.80) |
| Hemorrhagic Stroke                                                | 1.53 | (1.04- 2.25) |

Model I was adjusted for age, sex, BMI, smoking and drinking habits.

Model II was adjusted for variables in model I plus diabetes and serum total cholesterol.

Model III was adjusted for variables in model II plus percent energy intake from protein and total fat

## Participants Flow Chart

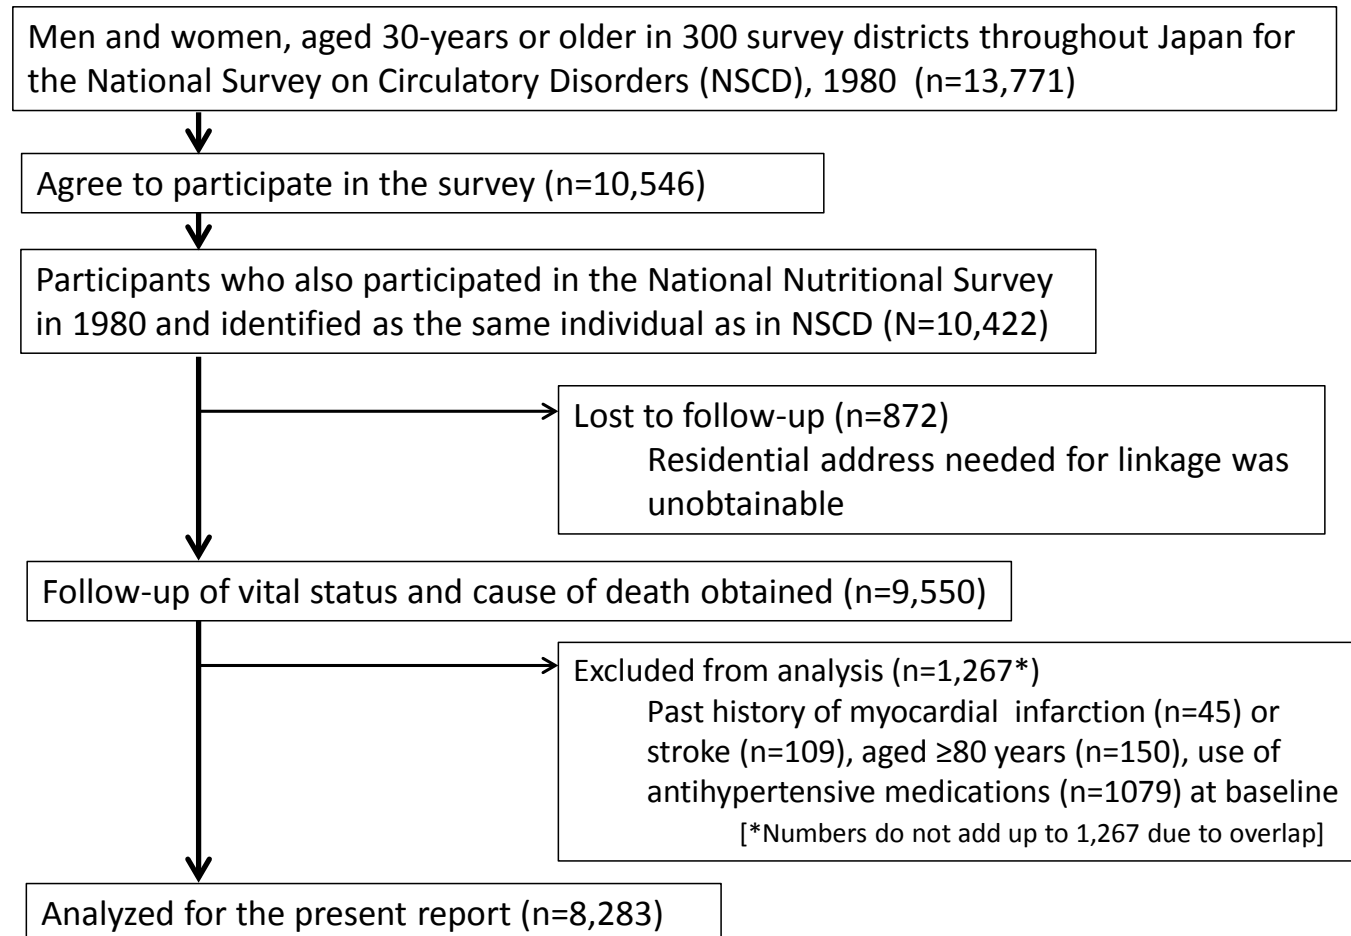

Supplement: bmjopen-2016-011632supp.pdf [file bmjopen-2016-011632supp.pdf]
